# Supplementary material
Source: publisher figshare collection journal article supplement (https://tandf.figshare.com/articles/dataset/_/7687232)
Supplement: Supplementary file 1 [file 1]

Archive with 2 entries (2 files):
- gbif_a_1563686_sm2416.pdf
- gbif_a_1563686_sm0733.docx
