# Supplementary material
Source: publisher figshare collection journal article supplement (https://tandf.figshare.com/articles/dataset/_/7687232)
Supplement: Supplementary file 1 [file 1 › gbif_a_1563686_sm0733.docx]

| **Protein** | **Natural Ligand** | | **Furanone C30** | | **AgNP** | | **Eugenol** | | **Eugenol+AgNP** | |
| --- | --- | --- | --- | --- | --- | --- | --- | --- | --- | --- |
| **Interacting amino acids** | **Score and desolvation energy** | **Interacting amino acids** | **Score and desolvation energy** | **Interacting amino acids** | **Score and desolvation energy** | **Interacting amino acids** | **Score and desolvation energy** | **Interacting amino acids** | **Score and desolvation energy** |
| LasR | Asp73a,Tyr56a , Tyr93a, Ala127b,  Val76b,  Cys79b Leu125b | 6056 &  −230.15 kcal mol-1 | Trp60a, Tyr93a,  Thr115a,  Ser129a Tyr56a, Asp73c, Tyr64b, Trp88b, Phe101b | 2896 &  −5.44  kcal mol-1 | Asp 73c | 378 | Tyr93a, Tyr56a, Asp73c,Tyr64b,  Trp88b, Ala127b,  Trp60b | 3290 &  −127.46 kcal mol-1 | Asp73c ,Thr75a,Tyr56a ,Ser129a,Trp88b,Ala105b,Leu110b | 3284 &  −114.11 kcal mol-1 |
| LasI | Thr75a,  Asn135a, Tyr52b, Asp73b, Trp100b | 3916 &  −160.9 kcal mol-1 | Thr75a, Ser50a, Leu49b | 2044 &  −2.39  kcal mol-1 | Asp 73c | 428 | Asn135a, Trp100b  Tyr52b | 2268 &  −115.29 kcal mol-1 | Asn135a,  Trp100,  His98b | 2906 &  −71.31 kcal mol-1 |
| MvfR | Tyr258a | 1550 &  −51.17 kcal mol-1 | Ile186b,  Tyr258b, Leu189b, Val211b | 2246 &  −41.57  kcal mol-1 | Asn 206a, Leu 207a, Arg 209a | 392 | Glu259a,  Tyr258a,  Leu207b | 2488 &  −106.46 kcal mol-1 | Tyr258a,  Glu259a,  Lys266b | 2536 &  −61.28 kcal mol-1 |

a: Hydrogen Bond/metalic interactions, b: Hydrophobic interaction, c: Electrostatic interaction
