# Supplementary material
Source: publisher figshare collection journal article supplement (https://tandf.figshare.com/articles/dataset/_/7687232)
Supplement: Supplementary file 1 [file 1 › gbif_a_1563686_sm2416.pdf]

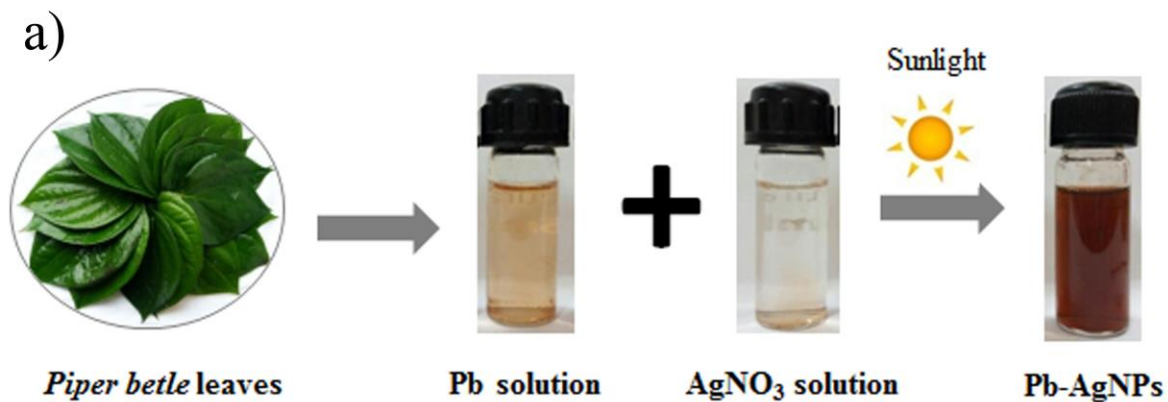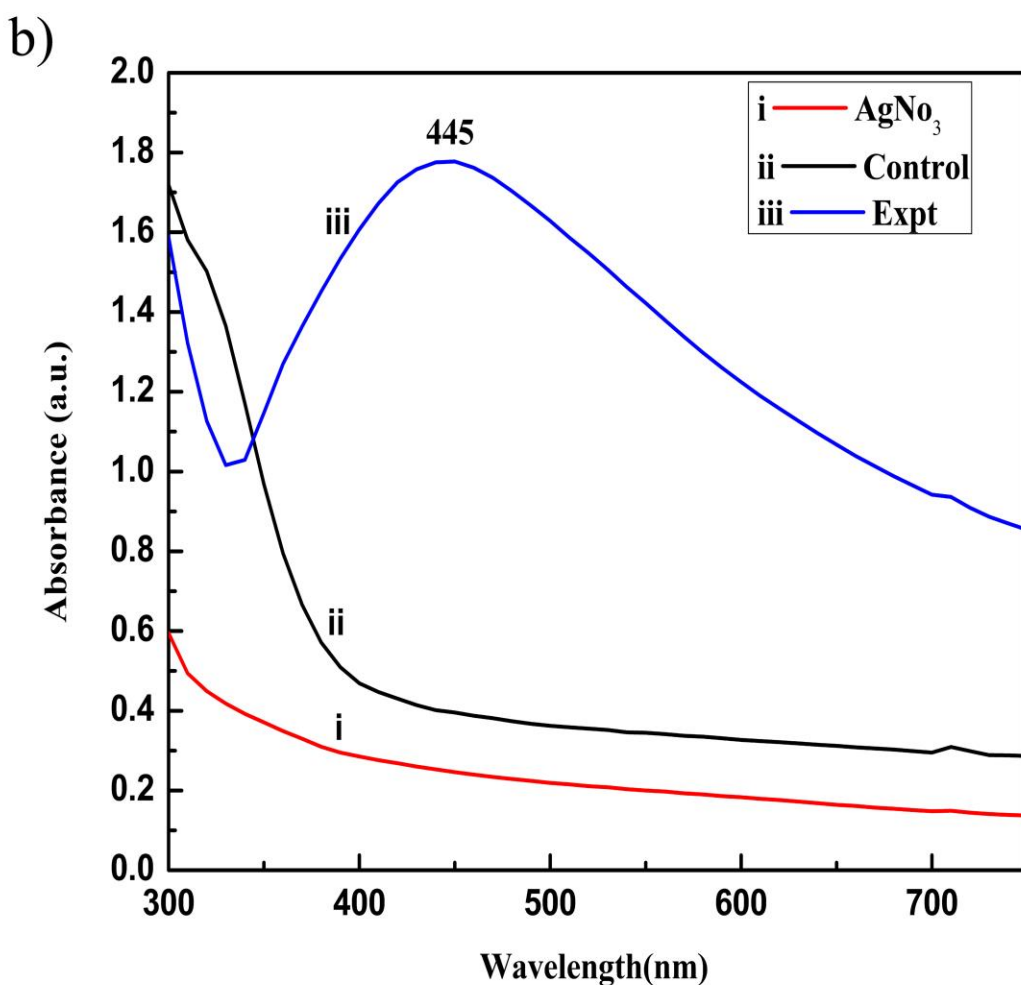

**Supplementary Figure 1.** (a) Schematic diagram of Pb-AgNPs synthesis exposed to sunlight; (b) UV-Vis spectra of (i) AgNO<sub>3</sub>, (ii) Control (*P. betle* leaf extract) and (iii) Experimental (Pb-AgNPs).

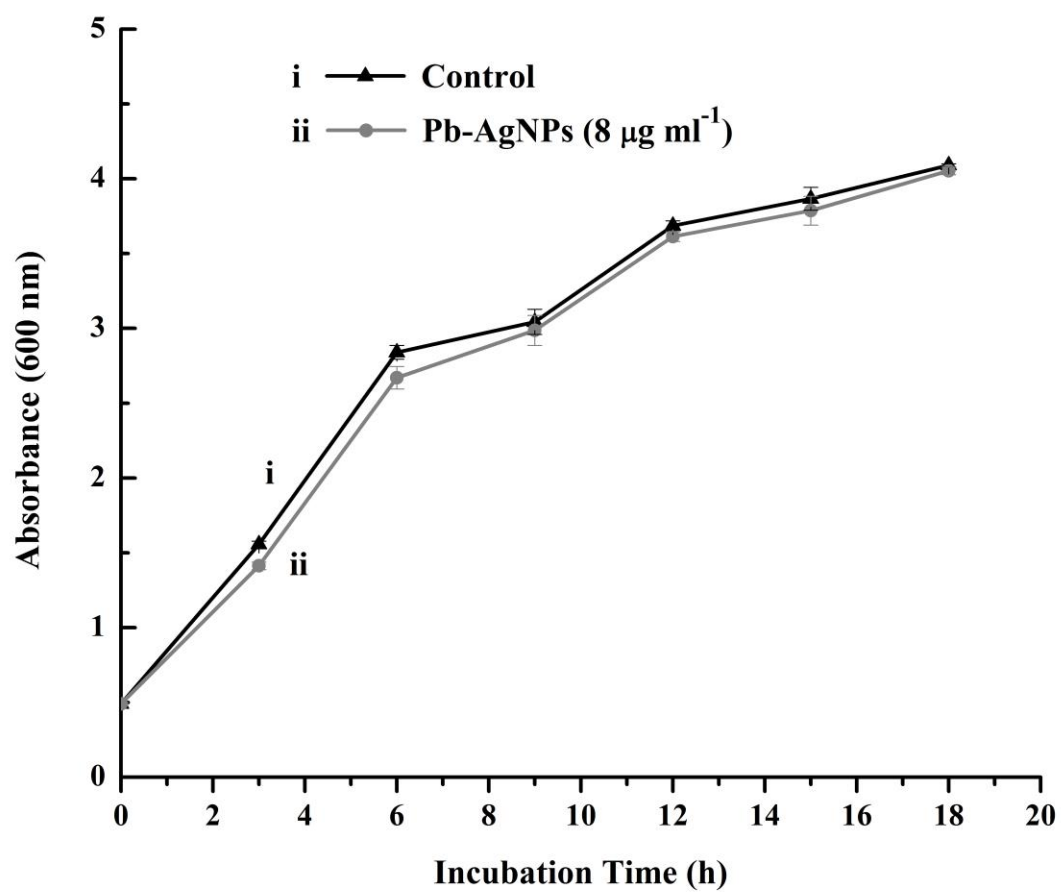

**Supplementary Figure 2.** Growth curve assay of *P. aeruginosa* PAO1 in the (i) absence and (ii) presence of Pb-AgNPs at 8  $\mu\text{g ml}^{-1}$ .
